# Supplementary material
Source: publisher figshare collection journal article supplement (https://karger.figshare.com/ndownloader/files/22386543)
Supplement: Supplementary file 1 [file 22386543]

## Supplemental Table. 1.

| Group          | Age (week) | Experiment time (week) | Diet        | Number | Drug/time (week) | Drug treated method |
|----------------|------------|------------------------|-------------|--------|------------------|---------------------|
| Pre-group      | 8          | 0                      | Normal salt | 5      | none             | none                |
| LS             | 8          | 8                      | Low salt    | 5      | none             | none                |
| HS             | 8          | 8                      | High salt   | 5      | none             | none                |
| HS+Saline      | 8          | 8                      | High salt   | 5      | Saline/4         | osmotic pump        |
| HS+hydralazine | 8          | 8                      | High salt   | 5      | Hydralazine/4    | water               |
| HS+reCREG      | 8          | 8                      | High salt   | 5      | reCREG protein/4 | osmotic pump        |

Supplemental Table. 1. The information of every group.

**Notes:** Pre-group: before starting the high-salt diet, five rats were sacrificed, which were termed the Pre-group; Low salt (LS) and High salt (HS) group, which were treated with low-salt (0.3% NaCl) and high-salt (8% NaCl) diets. At week 4 of high-salt loading, HS rats were administered recombinant CREG1 protein (reCREG) (35  $\mu\text{g}/\text{kg}\cdot\text{d}$ ) (termed HS+reCREG group) and saline (termed HS+Saline group) via a subcutaneous osmotic pump, and were also administered hydralazine (20  $\text{mg}/\text{kg}\cdot\text{d}$ ) (termed HS+ hydralazine group) in drinking water.

## Supplemental Table. 2.

| Primer          | sequences(5'to3')      |
|-----------------|------------------------|
| GAPDH-F         | TCAACGACCCCTTCATTGAC   |
| GAPDH-R         | ATGCAGGGATGATGTTCTGG   |
| CREG-F          | TGTCGGGAACTGTGACCAAG   |
| CREG-R          | CTTTAGTTGTTGAAATCTGTG  |
| TGF $\beta$ 1-F | GCAAGTCGCTCGTTCA       |
| TGF $\beta$ 1-R | GCCTTAGTTTGGACAGGATCTG |
| Foxp1-F         | CTGGTGGCATTCCCTCTCTG   |
| Foxp1-R         | AAAGGCCCAAAGAGTCAAGTG  |

Supplemental Table. 2. Primer sequences for CREG, GAPDH, TGF- $\beta$ 1, and Foxp1.

## Supplemental Table. 3.

| antibody          | company        | Catalog numbers |
|-------------------|----------------|-----------------|
| CD68              | Abcam          | ab125212        |
| TGF- $\beta$ 1    | Cell Signaling | 3711S           |
| CREG              | Abcam          | ab68341         |
| GAPDH             | Cell Signaling | 5174T           |
| cleaved caspase 3 | Cell Signaling | 9661T           |
| Bcl2              | Abcam          | ab184925        |
| Bax               | Abcam          | ab32503         |
| collagen IV       | Abcam          | ab6586          |
| fibronectin       | Abcam          | ab2413          |
| Smad2/3           | Abcam          | ab202445        |
| pSmad2            | Abcam          | ab53100         |
| Smad7             | Abcam          | ab216428        |
| Foxp1             | Abcam          | ab16645         |

Supplemental Table. 3. The catalog numbers and company of all antibodies used for IHC and westerns.

# Supplemental Fig. 1.

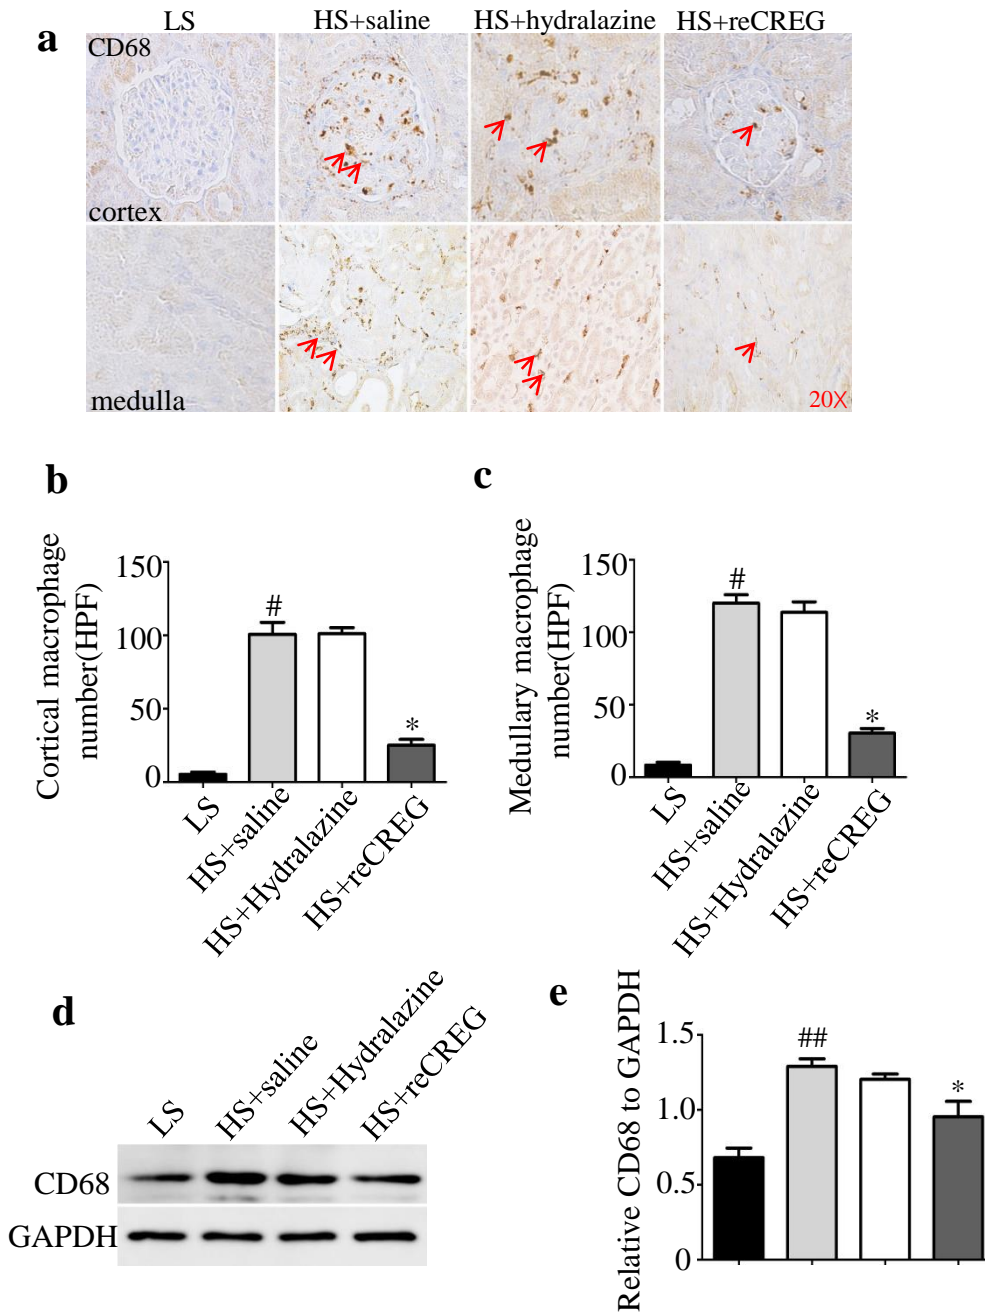

**Supplemental Fig. 1.** ReCREG inhibits macrophage infiltration into kidney cortex and medulla. a-c Immunohistochemical staining was showed the expression of CD68 in renal cortex and medulla; d, e Western blotting revealed that the expression of CD68 protein. <sup>#</sup> $P < 0.05$ , <sup>##</sup> $P < 0.05$  versus LS; <sup>\*</sup> $P < 0.05$  versus HS+Saline. Data are expressed as mean  $\pm$  SEM,  $n = 5$ .

## Supplemental Fig. 2.

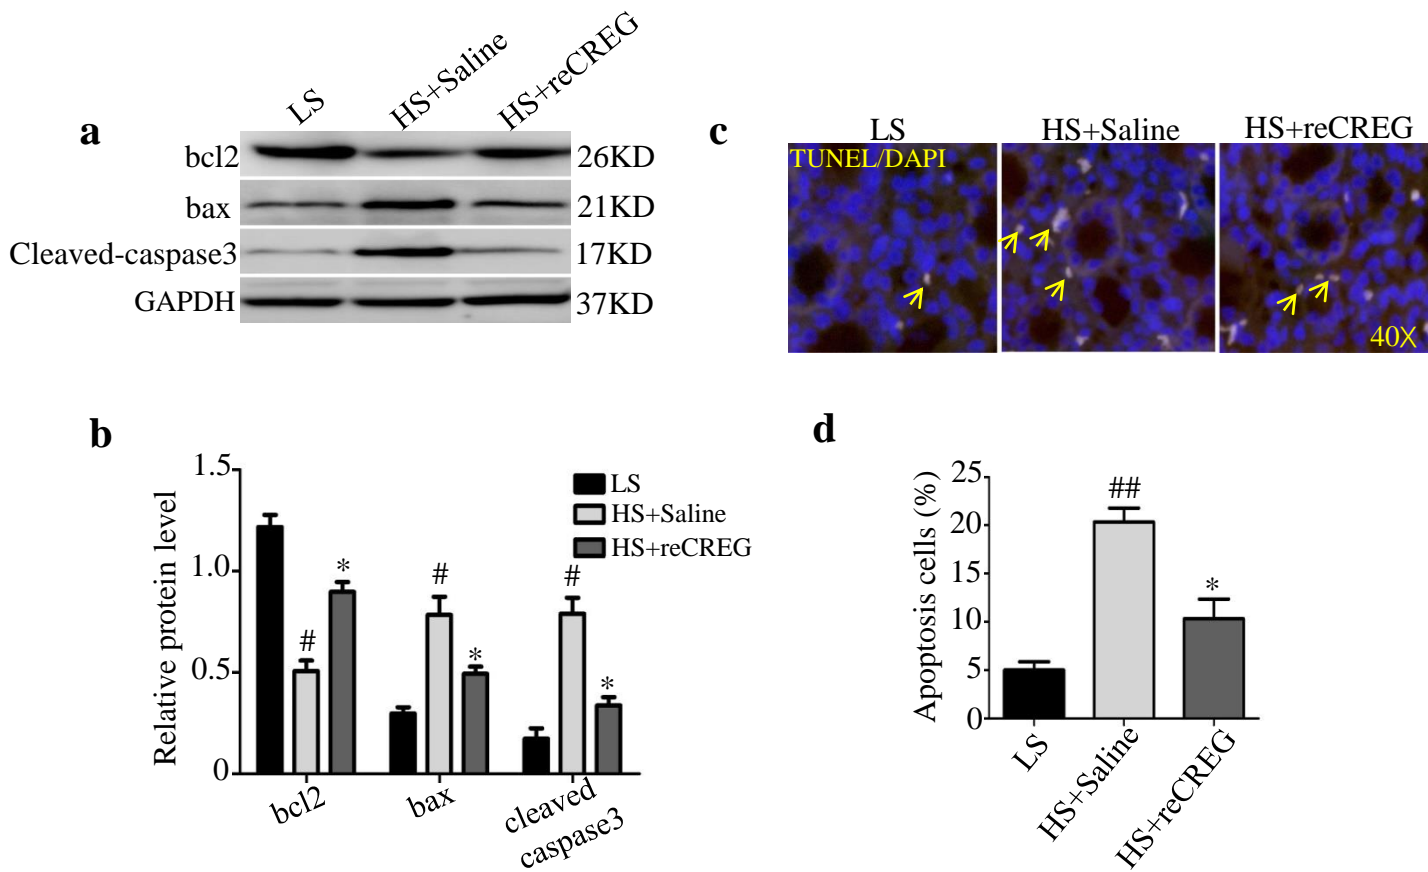

**Supplemental Fig. 2.** ReCREG reduces high-salt-induced renal-cell apoptosis. a, b Western blotting was used to analyze the expression of bcl2, bax, and cleaved caspase 3 in the different groups at week eight; c, d Level of renal cells apoptosis was evaluated by TUNEL staining. # $P < 0.05$ , ## $P < 0.01$  versus LS; \* $P < 0.05$  versus HS+Saline. Data are expressed as mean  $\pm$  SEM,  $n = 5$ .

### Supplemental Fig. 3.

**a**

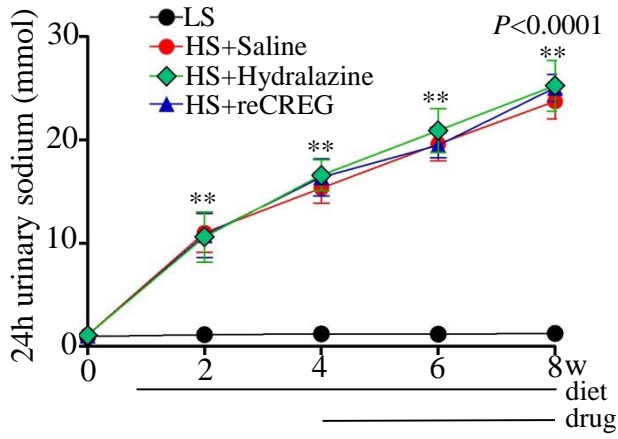

**b**

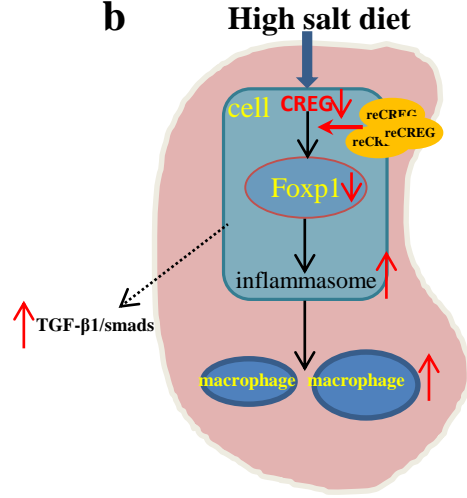

**Supplemental Fig. 3.** A 24h urinary sodium was supervised; b A schematic picture was demonstrated how CREG protected the kidney function.  $**P < 0.01$  versus LS, Data are expressed as mean  $\pm$  SEM, n=5.

## **Assessment of renal-cell apoptosis**

Terminal deoxyribonucleotidyl transferase-mediated dUTP-biotin nick end labeling (TUNEL) was used to analyze renal-cell apoptosis. An in situ Cell Death Detection Kit (Roche Diagnostics, Indianapolis, USA) was used to detect apoptotic nuclei, and 4'6-diamidino-2-phenylindole (DAPI) (Sigma) was used to label cell nuclei. An apoptotic index was assigned using the percentage of apoptotic cells.

## **Western blotting**

Briefly, kidney samples were dissected and homogenized. The homogenized tissues were lysed in RIPA buffer (Thermo Scientific, USA) and then centrifuged at  $12,000 \times g$  for 10 min at  $4^{\circ} C$ . Equal amounts of sample were separated by SDS-PAGE (at 150 V for 1 h), and then proteins were transferred into a polyvinylidene difluoride membrane. After 5% non-fat dry milk in TBST blocking, the membrane was incubated with antibodies against GAPDH (Cell Signaling), cleaved caspase 3 (Cell Signaling), Bcl2 (Abcam), Bax (Abcam), collagen IV (Abcam), fibronectin (Abcam), Smad2/3 (Abcam), pSmad2 (Abcam), Smad7 (Abcam), and Foxp1 (Abcam) at  $4^{\circ} C$  overnight, all antibodies were diluted 1:1000. After washing, the membrane was incubated with Goat anti-rabbit (Thermo, USA) (1:5000) for 2 hours at  $25^{\circ} C$  as described previously [11], the catalog numbers of all antibodies were listed in supplemental Table 2.
